# Supplementary material
Source: PubMed Central journal article supplement (PMC9771946)
Supplement: NIHMS1828638-supplement-Supinfo.pdf [file NIHMS1828638-supplement-Supinfo.pdf]

### Supplementary Appendix 1: Included Surgical Procedures

|                                              |
|----------------------------------------------|
| Total Shoulder Arthroplasty                  |
| Total Hip Arthroplasty                       |
| Prostatectomy, Laparoscopic                  |
| Hysterectomy, Laparoscopic                   |
| Cholecystectomy, Laparoscopic                |
| Initial Inguinal Hernia Repair, Open         |
| Initial Inguinal Hernia Repair, Laparoscopic |
| Lumbar Laminotomy                            |
| Lumbar Laminectomy                           |
| Hysterectomy, Vaginal                        |
| Carotid Endarterectomy                       |
| Total Knee Arthroplasty                      |
| Low Anterior Resection, Laparoscopic         |
| Ventral Hernia Repair, Open                  |

**Supplementary Appendix 2:** List of outpatient procedures using HCPCS/CPT codes, and inpatient procedures using ICD9-CM or ICD10-PCS codes

| Procedure                                    | CPT code      | ICD9/10                                         |
|----------------------------------------------|---------------|-------------------------------------------------|
| Total Shoulder Arthroplasty                  | 23472         | 81.51, 81.54, 81.88, 81.80, 81.81, 81.83, 81.23 |
| Total Hip Arthroplasty                       | 27130 , 27134 | 81.21, 81.4, 81.51                              |
| Prostatectomy, Laparoscopic                  | 55866         | 60.2*, 60.3*, 60.4*, 60.5* 60.6*                |
| Hysterectomy, Laparoscopic                   | 58571         | 68.3*, 68.4*, 68.5*, 68.6*, 68.7*, 68.9*        |
| Cholecystectomy, Laparoscopic                | 47562         | 51.23, 51.24                                    |
| Initial Inguinal Hernia Repair, Open         | 49505         | 550*, 53.0*, 53.1*                              |
| Lumbar Laminotomy/Laminectomy                | 63030, 63047  | 03.0*, 03.4*, 03.5*, 03.6*                      |
| Hysterectomy, Vaginal                        | 58262         |                                                 |
| Carotid Endarterectomy                       | 35301         | 38.02, 38.12, 38.32, 38.42, 38.62               |
| Total Knee Arthroplasty                      | 27447 , 27487 | 81.22, 81.43, 81.47, 81.54, 81.55               |
| Low Anterior Resection, Laparoscopic         | 44207         | 48.0*, 48.1*, 48.4*, 48.5*, 48.6*               |
| Initial Inguinal Hernia Repair, Laparoscopic | 49650         | 17.1*, 17.2*                                    |
| Ventral Hernia Repair, Open                  | 49560         | 53.41, 53.49, 53.5*, 53.61, 53.69               |

### Supplementary Appendix 3: Flow Chart Inclusion Criteria

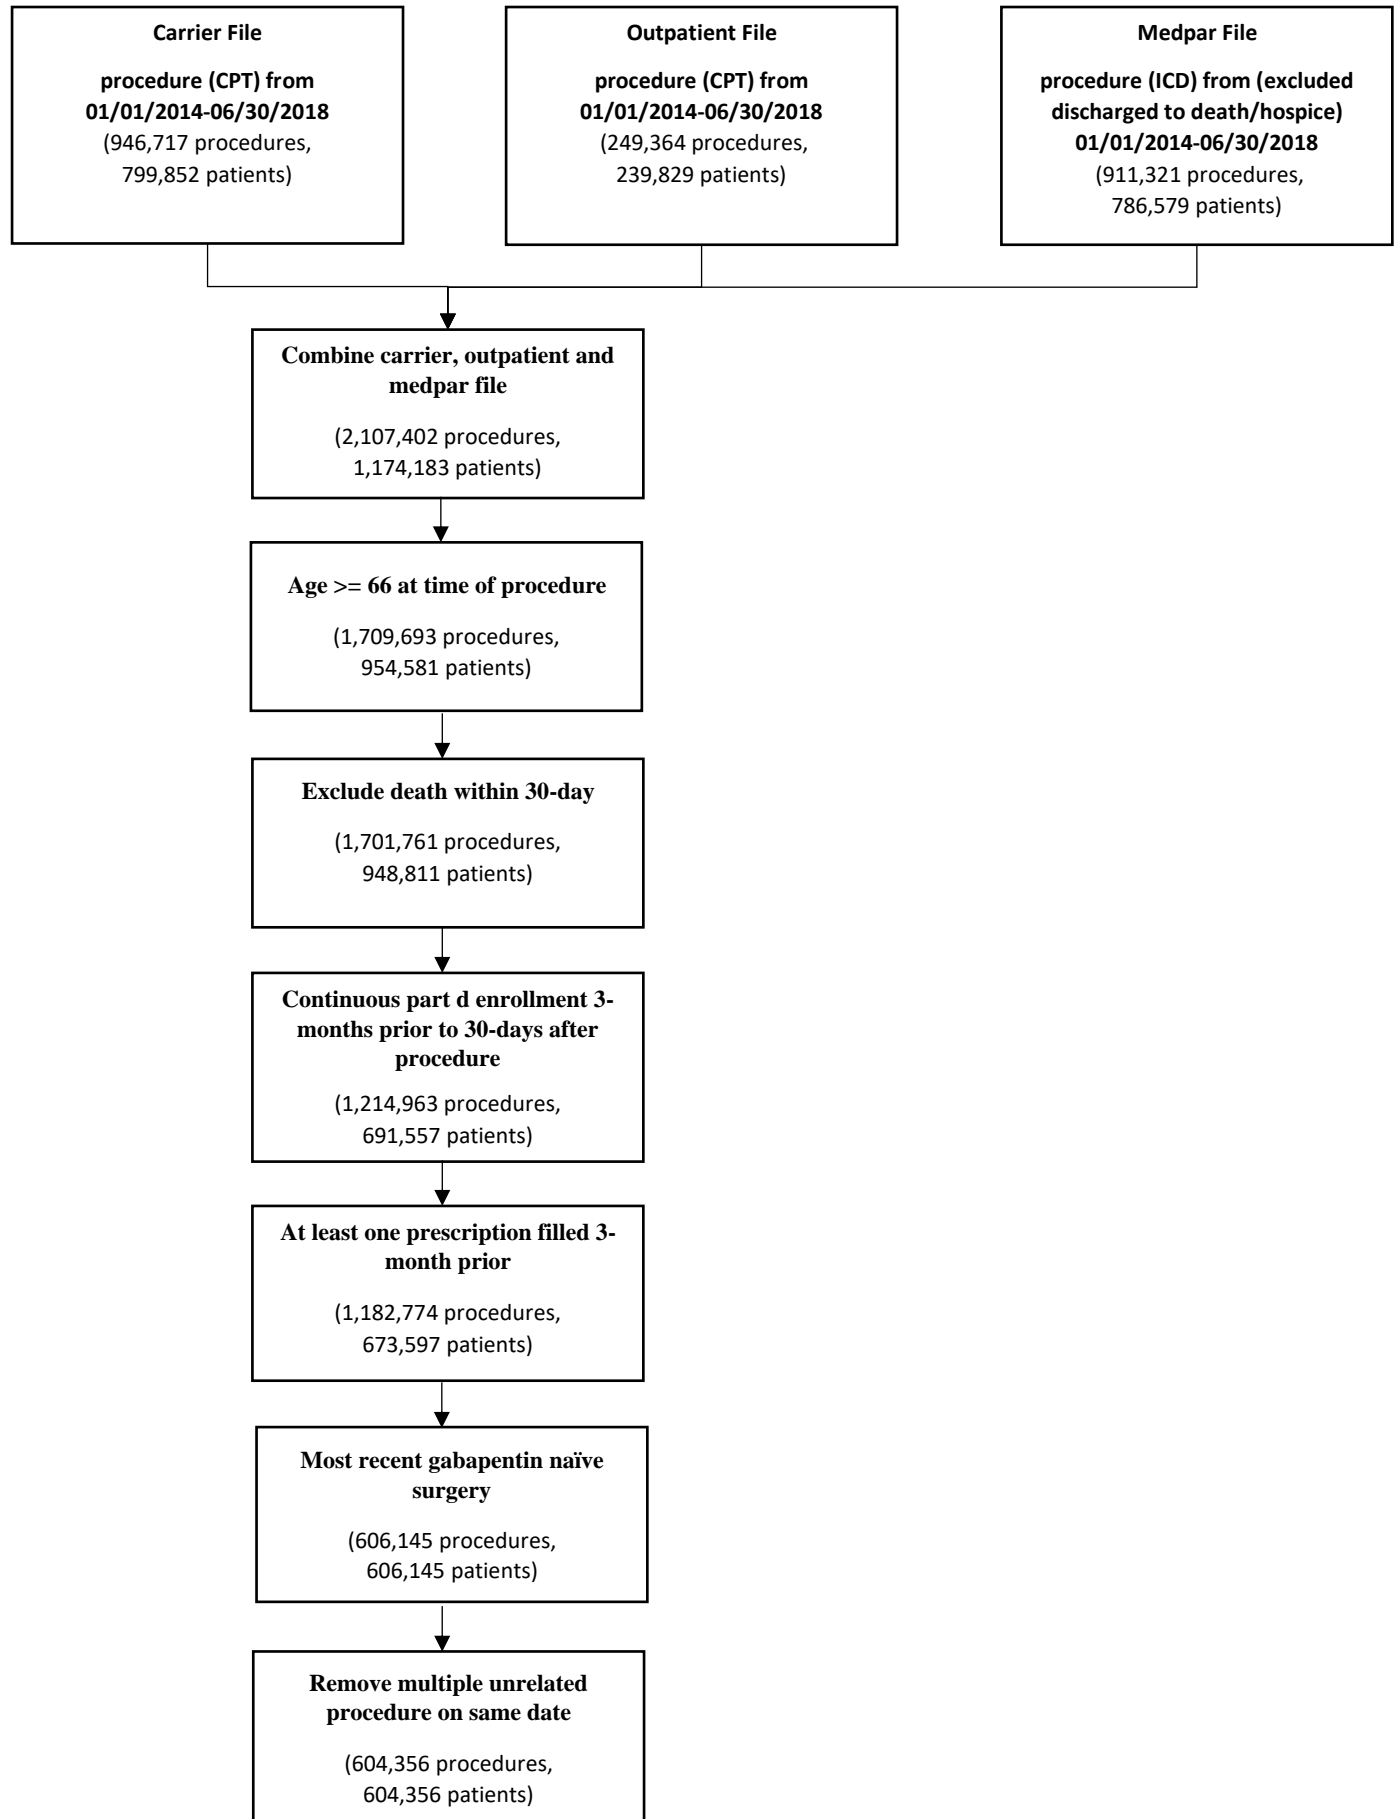

#### **Supplementary Appendix 4: List of opioids used in analysis**

*Butorphanol*  
*Codeine*  
*Dihydrocodeine*  
*Fentanyl*  
*Hydrocodone*  
*Hydromorphone*  
*Meperidine*  
*Morphine*  
*Oxycodone*  
*Oxymorphone*  
*Pentazocine*  
*Tapentadol*  
*Tramadol*

**Supplementary Appendix 5: Univariate analysis for prolonged use of gabapentin**

|                                                                      | Unadjusted        |         |
|----------------------------------------------------------------------|-------------------|---------|
|                                                                      | OR (95% CI)       | p-value |
| <b>Age</b>                                                           | 1.00 (1.00, 1.01) | 0.5865  |
| <b>Gender</b>                                                        |                   | <0.0001 |
| Male                                                                 | ref.              |         |
| Female                                                               | 1.19 (1.10, 1.28) |         |
| <b>Race</b>                                                          |                   | 0.2634  |
| White                                                                | ref.              |         |
| Non-white                                                            | 1.06 (0.96, 1.17) |         |
| <b>Charlson Comorbidity Score</b>                                    |                   | <0.0001 |
| 0                                                                    | ref.              |         |
| 1-2                                                                  | 1.10 (1.01, 1.20) |         |
| 3-4                                                                  | 1.59 (1.43, 1.77) |         |
| 5+                                                                   | 2.55 (2.29, 2.84) |         |
| <b>Concurrent medication use (opioid use)</b>                        |                   | <0.0001 |
| <b>+/- 7 days around discharge</b>                                   |                   |         |
| No                                                                   | ref.              |         |
| Yes                                                                  | 0.50 (0.46, 0.54) |         |
| <b>90-180 days after discharge</b>                                   |                   | <0.0001 |
| No                                                                   | ref.              |         |
| Yes                                                                  | 3.37 (3.12, 3.63) |         |
| <b>Facility type</b>                                                 |                   | <0.0001 |
| Inpatient                                                            | ref.              |         |
| Outpatient                                                           | 2.00 (1.84, 2.17) |         |
| <b>Disposition location</b>                                          |                   | <0.0001 |
| Home                                                                 | ref.              |         |
| Home under care of organized home health service organization        | 0.61 (0.57, 0.66) |         |
| Transfer to acute care                                               | 2.28 (1.13, 4.60) |         |
| Skilled nursing Facility                                             | 1.84 (1.64, 2.07) |         |
| Other                                                                | 0.26 (0.06, 1.08) |         |
| <b>Surgery planned</b>                                               |                   | <0.0001 |
| Yes                                                                  | ref.              |         |
| No                                                                   | 2.20 (1.93, 2.50) |         |
| <b>Care complexity (number of physicians seen in prior 6 months)</b> |                   | <0.0001 |
| q1 (1-2)                                                             | ref.              |         |
| q2 (3-11)                                                            | 0.82 (0.73, 0.91) |         |
| q3 (12-17)                                                           | 0.94 (0.86, 1.03) |         |
| q4 (18-161)                                                          | 1.51 (1.37, 1.66) |         |
| <b>Type of procedure</b>                                             |                   | <0.0001 |

|                                                      |                    |
|------------------------------------------------------|--------------------|
| Total Knee Arthroplasty                              | ref.               |
| Total Hip Arthroplasty                               | 0.88 (0.79, 0.99)  |
| Lumbar Laminotomy/Lumbar Laminectomy                 | 3.25 (2.93, 3.61)  |
| Total Shoulder Arthroplasty /Total Knee Arthroplasty | 1.28 (1.12, 1.46)  |
| Total Shoulder Arthroplasty /Total Hip Arthroplasty  | 0.91 (0.75, 1.11)  |
| Total Shoulder Arthroplasty                          | 1.96 (1.62, 2.37)  |
| Cholecystectomy, Laparoscopic                        | 5.19 (4.16, 6.47)  |
| Ventral Hernia Repair, Open                          | 3.39 (2.68, 4.30)  |
| Carotid Endarterectomy                               | 8.43 (6.31, 11.28) |
| Initial Inguinal Hernia Repair, Open                 | 4.01 (2.94, 5.48)  |
| Low Anterior Resection, Laparoscopic                 | 1.27 (0.85, 1.89)  |
| Hysterectomy                                         | 3.18 (2.12, 4.78)  |
| Initial Inguinal Hernia Repair, Laparoscopic         | 2.90 (1.82, 4.62)  |
| Prostatectomy, Laparoscopic                          | 3.49 (2.09, 5.81)  |
